# Supplementary material for: Site Fidelity and Individual Variation in Winter Location in Partially Migratory European Shags
Source: PubMed Central journal article supplement (PMC4043777; doi:10.1371/journal.pone.0098562), 2014-06-03
Supplement: pone.0098562.s009.pdf [file pone.0098562.s009.pdf]

**Table S2. Within- and among- winter repeatability (R) of distance from the Isle of May at which adult colour-ringed shags known to have bred on the Isle of May, and with an interval between first and last resightings that falls within the population-wide interquartile range, were resighted during winters 2009-2012.**

| Winter        | $R_{all}$ | $R_{res}$ | $V_i$ | $V_t$ | p     | No. individuals | No. sightings | No. sites | Distance range (km) |
|---------------|-----------|-----------|-------|-------|-------|-----------------|---------------|-----------|---------------------|
| 2009-2010     | 0.79      | 0.88      | 14191 | 16080 | 0.001 | 75              | 263           | 12        | 427                 |
| 2010-2011     | 0.81      | 0.80      | 9905  | 12446 | 0.001 | 178             | 593           | 17        | 676                 |
| 2011-2012     | 0.89      | 0.86      | 13567 | 15749 | 0.001 | 262             | 729           | 19        | 512                 |
| Among winters | 0.68      | 0.68      | 8948  | 14101 | 0.001 | 93              | 279           | 16        | 408                 |

Repeatabilities were estimated across the whole winter period (1<sup>st</sup> September- 31<sup>st</sup> March) for each year for individuals with an interval between the first and last resighting within the interquartile range of intervals for the whole population ( $R_{res}$ ).  $V_i$  and  $V_t$  are the within-individual and total variances of resighting distance from the Isle of May respectively, and p values are the probability of the estimated  $R_{chick}$  values occurring by chance. The numbers of individuals, sightings and sites are the totals included in each analysis, with “sites” defined for descriptive purposes as the number of known roosts separated by  $\geq 1$ km. Distance range is the maximum coastline distance covered. Repeatabilities calculated across all resighted individuals are also shown for comparative purposes ( $R_{all}$ , see also Table 6).
