# Supplementary material for: Site Fidelity and Individual Variation in Winter Location in Partially Migratory European Shags
Source: PubMed Central journal article supplement (PMC4043777; doi:10.1371/journal.pone.0098562), 2014-06-03
Supplement: pone.0098562.s010.pdf [file pone.0098562.s010.pdf]

**Table S3. Numbers of individual colour-ringed adult shags that were known to have bred on the Isle of May that were resighted at each winter survey site during winters 2009-2010, 2010-2011 and 2011-2012.**

| Site number | Distance from the IOM (km) | 2009-2010       |                 | 2010-2011       |                 | 2011-2012       |                 |
|-------------|----------------------------|-----------------|-----------------|-----------------|-----------------|-----------------|-----------------|
|             |                            | No. individuals | No. resightings | No. individuals | No. resightings | No. individuals | No. resightings |
| 1           | 486                        | 2               | 2               | 0               | 0               | 0               | 0               |
| 2           | 376                        | 2               | 2               | 9               | 18              | 7               | 24              |
| 3           | 328                        | 0               | 0               | 1               | 1               | 0               | 0               |
| 4           | 298                        | 0               | 0               | 0               | 0               | 5               | 5               |
| 5           | 291                        | 43              | 154             | 49              | 156             | 55              | 216             |
| 6           | 245                        | 6               | 8               | 3               | 3               | 15              | 23              |
| 7           | 239                        | 5               | 5               | 3               | 3               | 8               | 8               |
| 8           | 234                        | 1               | 1               | 3               | 3               | 1               | 1               |
| 9           | 231                        | 5               | 11              | 17              | 22              | 21              | 30              |
| 10          | 228                        | 0               | 0               | 2               | 2               | 0               | 0               |
| 11          | 226                        | 19              | 61              | 30              | 201             | 45              | 273             |
| 12          | 221                        | 0               | 0               | 5               | 8               | 9               | 17              |
| 13          | 204                        | 0               | 0               | 16              | 31              | 4               | 4               |
| 14          | 198                        | 13              | 20              | 11              | 16              | 0               | 0               |
| 15          | 196                        | 8               | 10              | 1               | 1               | 33              | 95              |
| 16          | 191                        | 6               | 12              | 3               | 3               | 8               | 8               |
| 17          | 147                        | 1               | 10              | 2               | 4               | 4               | 19              |
| 18          | 63                         | 3               | 3               | 0               | 0               | 0               | 0               |
| 19          | 14                         | 3               | 3               | 19              | 20              | 1               | 1               |
| 20          | 8                          | 0               | 0               | 38              | 40              | 108             | 127             |
| 21          | 7                          | 151             | 257             | 179             | 300             | 192             | 317             |
| 22          | <b>0</b>                   | <b>118</b>      | <b>130</b>      | <b>386</b>      | <b>624</b>      | <b>268</b>      | <b>398</b>      |
| 23          | -19                        | 1               | 1               | 3               | 4               | 3               | 5               |
| 24          | -32                        | 1               | 1               | 1               | 1               | 7               | 22              |
| 25          | -34                        | 0               | 0               | 2               | 3               | 5               | 12              |
| 26          | -58                        | 0               | 0               | 1               | 1               | 0               | 0               |
| 27          | -88                        | 0               | 0               | 6               | 7               | 0               | 0               |
| 28          | -136                       | 2               | 9               | 2               | 16              | 3               | 4               |

Sites defined for descriptive purposes as the number of roosts separated by  $\geq 1$ km (Figure 1). Positive and negative values are distances north and south of the Isle of May (highlighted in bold) respectively.
